# Supplementary material
Source: Springer Nature journal article supplement (https://www.springermedizin.de/resource/supplementary/12986_2006_80_MOESM1_ESM.pdf/25655322)

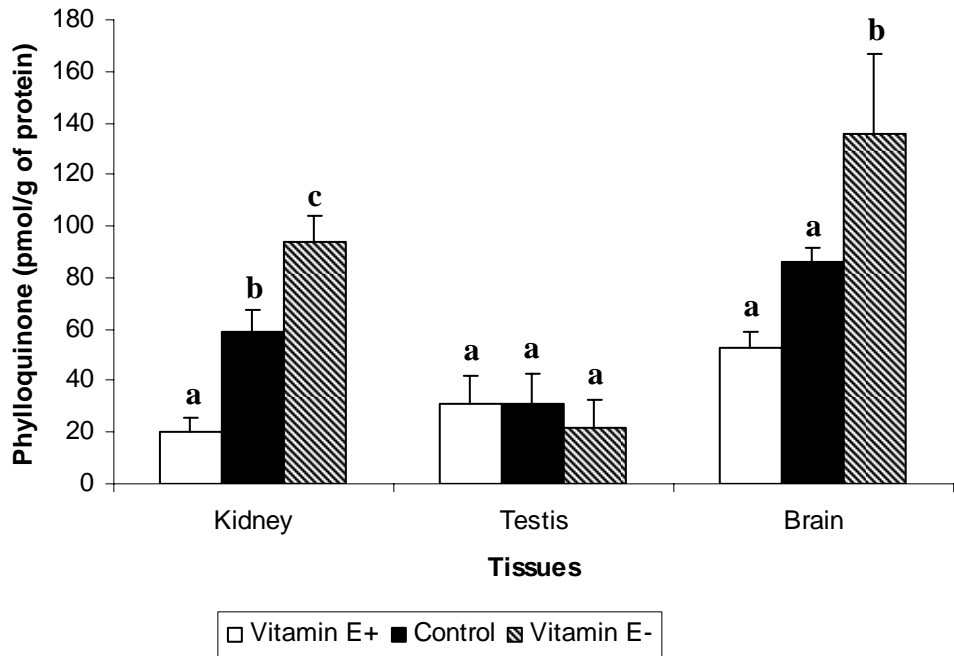

Supplement: MOESM1 [file 25655322]
